# Supplementary material for: Rapid Initiation of Injection Naltrexone for Opioid Use Disorder: A Stepped-Wedge Cluster Randomized Clinical Trial
Source: PubMed Central journal article supplement (PMC11079685; doi:10.1001/jamanetworkopen.2024.9744), 2024-05-08
Supplement: jamanetwopen-e249744-s002.pdf [file jamanetwopen-e249744-s002.pdf]

## Supplementary Online Content

Shulman M, Greiner MG, Tafessu HM, et al. Rapid initiation of injection naltrexone for opioid use disorder: a stepped-wedge cluster randomized clinical trial. *JAMA Netw Open*. 2024;7(5):e249744. doi:10.1001/jamanetworkopen.2024.9744

**eTable 1.** Medication Regimen by Induction Procedure

**eTable 2.** Summary of Adjunctive Medications by Induction Procedure

**eTable 3.** Study Assessments for Participants (RP and SP)

**eTable 4.** Reasons for Not Attempting XR-NTX Induction

This supplementary material has been provided by the authors to give readers additional information about their work.

**eTable 1:** Medication regimen by induction procedure.

| Protocol Day | Rapid Procedure (RP)                                   | Standard Procedure (SP)                                           |
|--------------|--------------------------------------------------------|-------------------------------------------------------------------|
| 1            | Buprenorphine 2-10mg                                   | Buprenorphine 8 mg                                                |
| 2            | -(washout) <sup>a</sup>                                | Buprenorphine 6 mg                                                |
| 3            | Naltrexone 1 mg                                        | Buprenorphine 4 mg                                                |
| 4            | Naltrexone 2 mg                                        | Buprenorphine 3 mg                                                |
| 5            | Naltrexone 6 mg                                        | Buprenorphine 2 mg                                                |
| 6            | Naltrexone 6 mg and XR-naltrexone 380mg IM             | -(washout) <sup>a</sup>                                           |
| 15           |                                                        | XR-naltrexone 380mg IM                                            |
|              | Scheduled adjunctive medications Days 1-6 <sup>b</sup> | Adjunctive medications as per site's usual practices <sup>c</sup> |

<sup>a</sup> Washout period with no opioids administered (24-hour period for RP; 7- to 10-day period for SP)

<sup>b</sup> Adjunctive medications for RP included: clonidine 0.1-0.2 mg every four hours (with hold parameters for systolic blood pressure < 90 mm Hg, or heart rate < 60 beats per minute), clonazepam 1 mg every six hours (with hold for oversedation), anti-nausea medication daily (prochlorperazine 10 mg or ondansetron 8 mg), sleep aid at bedtime (zolpidem 5-10 mg, trazodone 50-100 mg, or other sleep aids), and nicotine replacement therapy (patch and gum) if tobacco use. Additional doses of adjunctive medications could be given as needed and included antiemetics, sleep aids, and acetaminophen or ibuprofen.

<sup>c</sup> Adjunctive medications offered for SP varied based on sites' usual practices.

**eTable 2:** Summary of adjunctive medications by induction procedure.

|                       |                               | Induction Procedure   |                    |                    |
|-----------------------|-------------------------------|-----------------------|--------------------|--------------------|
|                       |                               | Standard<br>(N = 190) | Rapid<br>(N = 225) | Total<br>(N = 415) |
| Clonidine             | Number of participants        | 131 (68.9%)           | 221 (98.2%)        | 352 (84.8%)        |
|                       | Average number of days        | 4.7                   | 5.3                | 5.1                |
|                       | Average total daily dose (mg) | 0.2                   | 0.4                | 0.3                |
| Clonazepam            | Number of participants        | 45 (23.7%)            | 220 (97.8%)        | 265 (63.9%)        |
|                       | Average number of days        | 6.2                   | 4.7                | 4.9                |
|                       | Average total daily dose (mg) | 2.0                   | 2.7                | 2.5                |
| Other Benzodiazepines |                               |                       |                    |                    |
| Diazepam              | Number of participants        | 17 (8.9%)             | 2 (0.9%)           | 19 (4.6%)          |
|                       | Average number of days        | 4.4                   | 2.0                | 4.2                |
|                       | Average total daily dose (mg) | 10.8                  | 18.8               | 11.2               |
| Chlordiazepoxide      | Number of participants        | 15 (7.9%)             | 22 (9.8%)          | 37 (8.9%)          |
|                       | Average number of days        | 3.0                   | 2.3                | 2.6                |
|                       | Average total daily dose (mg) | 77.8                  | 102.0              | 90.5               |
| Lorazepam             | Number of participants        | 52 (27.4%)            | 88 (39.1%)         | 140 (33.7%)        |
|                       | Average number of days        | 3.7                   | 2.3                | 2.8                |
|                       | Average total daily dose (mg) | 2.1                   | 2.5                | 2.3                |
| Antiemetic            |                               |                       |                    |                    |
| Prochlorperazine      | Number of participants        | 0 (0%)                | 42 (18.7%)         | 42 (10.1%)         |
|                       | Average number of days        | -                     | 2.9                | 2.9                |
|                       | Average total daily dose (mg) | -                     | 11.5               | 11.5               |
| Promethazine          | Number of participants        | 51 (26.8%)            | 80 (35.6%)         | 131 (31.6%)        |
|                       | Average number of days        | 5.6                   | 4.3                | 4.8                |
|                       | Average total daily dose (mg) | 17.2                  | 45.3               | 32.5               |

|                                       |                               | Induction Procedure   |                    |                    |
|---------------------------------------|-------------------------------|-----------------------|--------------------|--------------------|
|                                       |                               | Standard<br>(N = 190) | Rapid<br>(N = 225) | Total<br>(N = 415) |
| Ondansetron                           | Number of participants        | 32 (16.8%)            | 81 (36.0%)         | 113 (27.2%)        |
|                                       | Average number of days        | 1.7                   | 4.3                | 3.5                |
|                                       | Average total daily dose (mg) | 4.9                   | 7.2                | 6.9                |
| Antidiarrheal                         |                               |                       |                    |                    |
| Loperamide                            | Number of participants        | 25 (13.2%)            | 96 (42.7%)         | 121 (29.2%)        |
| Sleep agent                           |                               |                       |                    |                    |
| Trazodone                             | Number of participants        | 134 (70.5%)           | 189 (84.0%)        | 323 (77.8%)        |
|                                       | Average number of days        | 5.9                   | 4.4                | 5.0                |
|                                       | Average total daily dose (mg) | 95.3                  | 100.6              | 98.0               |
| Zolpidem                              | Number of participants        | 0 (0%)                | 27 (12.0%)         | 27 (6.5%)          |
|                                       | Average number of days        | -                     | 1.9                | 1.9                |
|                                       | Average total daily dose (mg) | -                     | 11.8               | 11.8               |
| Mirtazapine                           | Number of participants        | 14 (7.4%)             | 7 (3.1%)           | 21 (5.1%)          |
| Doxepin                               | Number of participants        | 2 (1.1%)              | 4 (1.8%)           | 6 (1.4%)           |
| Melatonin                             | Number of participants        | 15 (7.9%)             | 8 (3.6%)           | 23 (5.5%)          |
| Non-Steroidal Anti-Inflammatory Agent |                               |                       |                    |                    |
| Ibuprofen                             | Number of participants        | 120 (63.2%)           | 187 (83.1%)        | 307 (74.0%)        |
| Aspirin                               | Number of participants        | 2 (1.1%)              | 1 (0.4%)           | 3 (0.7%)           |
| Naproxen                              | Number of participants        | 15 (7.9%)             | 2 (0.9%)           | 17 (4.1%)          |
| Nicotine Replacement Therapy          |                               |                       |                    |                    |
| Nicotine patch                        | Number of participants        | 38 (20.0%)            | 27 (12.0%)         | 65 (15.7%)         |
| Nicotine patch plus other             | Number of participants        | 24 (12.6%)            | 1 (0.4%)           | 25 (6.0%)          |
| Nicotine gum                          | Number of participants        | 6 (3.2%)              | 3 (1.3%)           | 9 (2.2%)           |
| Nicotine lozenge                      | Number of participants        | 16 (8.4%)             | 0 (0%)             | 16 (3.9%)          |
| Anxiety/Antihistamine Agents          |                               |                       |                    |                    |
| Hydroxyzine                           | Number of participants        | 90 (47.4%)            | 75 (33.3%)         | 165 (39.8%)        |

|                              |                        | Induction Procedure   |                    |                    |
|------------------------------|------------------------|-----------------------|--------------------|--------------------|
|                              |                        | Standard<br>(N = 190) | Rapid<br>(N = 225) | Total<br>(N = 415) |
| Diphenhydramine              | Number of participants | 25 (13.2%)            | 26 (11.6%)         | 51 (12.3%)         |
| Other                        | Number of participants | 6 (3.2%)              | 6 (2.7%)           | 12 (2.9%)          |
| GABA Agents/Muscle Relaxants |                        |                       |                    |                    |
| Gabapentin                   | Number of participants | 57 (30.0%)            | 42 (18.7%)         | 99 (23.9%)         |
| Pregabalin                   | Number of participants | 1 (0.5%)              | 2 (0.9%)           | 3 (0.7%)           |
| Baclofen                     | Number of participants | 60 (31.6%)            | 55 (24.4%)         | 115 (27.7%)        |
| Cyclobenzaprine              | Number of participants | 45 (23.7%)            | 48 (21.3%)         | 93 (22.4%)         |
| Other                        | Number of participants | 11 (5.8%)             | 58 (25.8%)         | 69 (16.6%)         |
| Neuroleptics                 |                        |                       |                    |                    |
| Quetiapine                   | Number of participants | 41 (21.6%)            | 42 (18.7%)         | 83 (20.0%)         |
| Olanzapine                   | Number of participants | 3 (1.6%)              | 0 (0%)             | 3 (0.7%)           |
| Risperidone                  | Number of participants | 1 (0.5%)              | 0 (0%)             | 1 (0.2%)           |
| Haloperidol                  | Number of participants | 1 (0.5%)              | 3 (1.3%)           | 4 (1.0%)           |
| Chlorpromazine               | Number of participants | 1 (0.5%)              | 0 (0%)             | 1 (0.2%)           |

**eTable 3:** Study assessments for participants (RP and SP)<sup>a</sup>

| Assessment                                                | Frequency                                                                     |
|-----------------------------------------------------------|-------------------------------------------------------------------------------|
| Informed consent and medical release                      | Baseline                                                                      |
| <i>General Measures</i>                                   |                                                                               |
| Inclusion/exclusion                                       | Baseline, confirmed prior to RP/SP enrollment                                 |
| Locator form                                              | Baseline, post-induction Week 3, EOM                                          |
| Demographics form                                         | Baseline                                                                      |
| PhenX Tier 1 assessments (30)                             | Baseline                                                                      |
| Prisoner status assessment                                | Baseline, post-induction Week 3                                               |
| Motivation scale                                          | Baseline                                                                      |
| End of induction form                                     | At discharge from inpatient detoxification unit                               |
| End of medication treatment form                          | EOM                                                                           |
| Treatment satisfaction survey                             | Post-induction Week 6                                                         |
| Study completion form                                     | Post-induction Week 8                                                         |
| <i>Safety and Medical Measures</i>                        |                                                                               |
| Medical and psychiatric history                           | Baseline                                                                      |
| HIV and hepatitis assessments                             | Baseline                                                                      |
| Pregnancy and birth control assessment                    | Baseline, before each XR-NTX injection                                        |
| Fagerström test for nicotine dependence (FTND) (31)       | Baseline                                                                      |
| NIDA cannabis assessment                                  | Baseline                                                                      |
| DSM-5 criteria (18)                                       | Baseline                                                                      |
| Generalized anxiety disorder (GAD-7) questionnaire (32)   | Baseline                                                                      |
| Patient health questionnaire panic disorder (PHQ-PD) (33) | Baseline                                                                      |
| PTSD checklist for DSM-5 (PCL-5) (34)                     | Baseline                                                                      |
| ADHD self-report scale (ASRS) (35)                        | Baseline                                                                      |
| Daily medication administration log                       | Baseline, daily during induction phase                                        |
| Concomitant medications                                   | Post-induction Weeks 1, 2, 3, 4, 6, 8                                         |
| Adverse events and serious adverse events                 | Baseline, daily during induction phase, post-induction Weeks 1, 2, 3, 4, 6, 8 |
| Medication injection site abnormality log                 | As needed throughout study                                                    |
| Opioid overdose questionnaire                             | Baseline, post-induction Weeks 1, 2, 3, 4, 6, 8                               |
| Fatal opioid overdose form                                | As needed throughout study                                                    |
| Death form                                                | As needed throughout study                                                    |
| <i>Treatment Compliance Measures</i>                      |                                                                               |
| Medical management log                                    | At each study visit                                                           |
| Psychosocial participation log                            | At each study visit                                                           |
| <i>Outcome Measures</i>                                   |                                                                               |
| Timeline Followback (TLFB) for substance use (36)         | Baseline, post-induction Weeks 1, 2, 3, 4, 6, 8                               |

|                                                                 |                                                                                   |
|-----------------------------------------------------------------|-----------------------------------------------------------------------------------|
| Timeline Followback (TLFB) for MOUD                             | Baseline, post-induction Weeks 1, 2, 3, 4, 6, 8                                   |
| Urine drug screen (UDS) (with fentanyl testing)                 | Baseline, before each XR-NTX injection                                            |
| Clinical opiate withdrawal scale (COWS) (37)                    | Baseline, daily or more frequently (depending on RP or SP) during induction phase |
| Subjective opioid withdrawal scale (SOWS) (38)                  | Baseline, daily during induction phase, post-induction Weeks 1, 2, 3, 4, 6, 8     |
| Visual analog scales (VAS) opioid craving                       | Baseline, daily during induction phase, post-induction Weeks 1, 2, 3, 4, 6, 8     |
| Visual analog scales (VAS) opioid response                      | As needed throughout post-induction phase                                         |
| Patient health questionnaire for depression (PHQ-9) (39)        | Baseline, weekly during induction phase, post-induction Weeks 1, 2, 3, 5, 6, 8    |
| Mental health assessment (for suicidality)                      | As needed throughout the study                                                    |
| <i>Health Services Measures</i>                                 |                                                                                   |
| Patient-reported outcomes measurement information (PROMIS) (40) | Baseline, post-induction Weeks 4, 8                                               |
| Non-medical and other services (NMS) (41,42)                    | Baseline, post-induction Weeks 4, 8                                               |
| <i>Genetics Measures</i>                                        |                                                                                   |
| Genetics sample                                                 | Baseline                                                                          |
| Family origin assessment                                        | Baseline                                                                          |

EOM=end of medication

<sup>a</sup>Site-level and implementation assessments will be described separately.

**eTable 4:** Reasons for not attempting XR-NTX Induction

| <i>Reason</i>                                                                       | <i>Count</i> | <i>Percent</i> |
|-------------------------------------------------------------------------------------|--------------|----------------|
| Prefers buprenorphine maintenance                                                   | 848          | 34.7%          |
| Prefers methadone maintenance                                                       | 1085         | 44.4%          |
| Prefers detoxification without MOUD afterwards                                      | 280          | 11.5%          |
| Previous side effects from XR-NTX                                                   | 10           | 0.4%           |
| Previous attempt to XR-NTX failed to maintain abstinence                            | 13           | 0.5%           |
| Does not like injections                                                            | 24           | 1.0%           |
| There is a concern about finding a provider for vivitrol injections after the study | 4            | 0.2%           |
| There is a concern about paying for the shots after the study                       | 2            | 0.1%           |
| There is a concern about their insurance coverage for the inpatient induction       | 4            | 0.2%           |
| Other                                                                               | 196          | 8.0%           |

*Percentages are calculated with a denominator of the number of pre-screen participants who did not attempt XR-NTX induction (N=2443) and sum to greater than 100% because multiple reasons may be selected.*



## Supplemental Resource 1: Rapid Procedure Example Order Set

### Rapid Procedure Example Order Set

| RAPID PROCEDURE         |         |                                 |                               |                                                  |
|-------------------------|---------|---------------------------------|-------------------------------|--------------------------------------------------|
| STEP 1                  | STEP 2  | STEP 3                          | STEP 4                        | STEP 5                                           |
| BUPRENORPHINE INDUCTION | WASHOUT | LOW-DOSE NALTREXONE (0.5mg/1mg) | LOW-DOSE NALTREXONE (3mg/3mg) | XR-NTX (Vivitrol®) (PO NTX 6mg/ XR-NTX 380mg IM) |

#### STANDING MEDICATIONS/ORDERS (*throughout all steps in Rapid Procedure*):

- clonidine 0.2mg q4h, hold for sBP<90 or HR<60 or HR>120 and notify prescriber (*may reduce to 0.1mg q4h*)
- clonazepam 1mg po q4h (MDD=4mg), hold for oversedation
- prochlorperazine 10mg q24h for nausea and vomiting
- trazodone 50-100mg po qhs for sleep aid
- if tobacco use--nicotine patch (7mg/14mg/21mg) topically daily
- oral electrolyte solution (Gatorade) 8 ounces po q4h

#### PRN MEDICATIONS:

- prochlorperazine 10 mg q8h PRN for nausea/vomiting
- aluminum hydroxide/magnesium hydroxide (Maalox) 30 ml q4h PRN for dyspepsia
- loperamide 4mg po q24h PRN for diarrhea
- PRN sleep aid (e.g., Zolpidem 5-10mg, Benadryl 50mg, or mirtazapine 7.5mg)
- ibuprofen 600 mg q8h PRN for muscle aches and/or pain (maximum daily dosing=3200mg)
- acetaminophen 650mg q4h PRN for HA or mild pain (maximum daily dosing=4gm)
- PRN nicotine gum/lozenges

#### SWIFT PROTOCOL STEPS (each step ~24h) (*to be reviewed and ordered by prescribing clinician*):

##### STEP 1: buprenorphine induction

- Confirm active orders for standing medications as listed above (i.e., clonidine, clonazepam,...)
- buprenorphine 2mg x1 if **COWS ≥8**
- PRN buprenorphine 2mg q1h if **COWS ≥ 7**(optimal total daily dose 6-8mg; do not exceed 10mg for SWIFT protocol)

##### STEP 2: washout (no opioid agonists given for 24h)

- confirm active orders for standing medications as listed above and that patient is hydrated and taking these medications

##### STEP 3: low-dose naltrexone titration

- Confirm standing adjunctive medications as listed above
- 1-2 hours after adjunctive meds -- **naltrexone 0.5mg po x1 if COWS ≤ 5**

*IF COWS > 5, notify prescriber and can reassess later*

- 3-4 hours after 1<sup>st</sup> naltrexone dose -- **naltrexone 1mg po x1 if COWS does not increase 3+ from last assessment**  
**IF COWS increases by 3 or more, then do not give the second naltrexone dose and start with naltrexone 1mg tomorrow (instead of 3mg) and the second dose is still naltrexone 3mg**

#### STEP 4: low-dose naltrexone titration\*\*

- Confirm standing adjunctive medications as listed above
- 1-2 hours after adjunctive meds -- **naltrexone 3mg po x1 if COWS ≤ 5 OR naltrexone 1mg** if patient only received naltrexone 0.5mg yesterday
- 3-4 hours after 1<sup>st</sup> naltrexone dose -- **naltrexone 3mg po x1 if COWS does not increase 3+ from last assessment**  
**IF COWS increases by 3 or more, then do not give the second naltrexone dose and goto the following day and start with naltrexone 6mg**

\*\*IF patient is requesting to leave this day, then consider administration of Vivitrol 380mg IM if both naltrexone 3mg doses tolerated (**COWS ≤ 5**).

#### STEP 5: low-dose naltrexone titration and Vivitrol administration

- Confirm standing adjunctive medications as listed above
- 1-2 hours after adjunctive meds -- **naltrexone 6mg po x1 if COWS ≤ 5**
- 3-4 hours after 1<sup>st</sup> naltrexone dose -- **Vivitrol 380mg IM x1 if COWS does not increase 3+ from last assessment**

#### EXAMPLE DOSING SCHEDULE ON NALTREXONE DAY:

9AM: clonidine, clonazepam, prochlorperazine, PO hydration

10AM: COWS assessment, 1st naltrexone dose

1PM: clonidine and clonazepam, PO hydration (other PRN adjunctive meds)

2PM: COWS assessment, 2nd naltrexone dose

5PM: clonidine and clonazepam, PO hydration (other PRN adjunctive meds)

9PM: clonidine and clonazepam, PO hydration (other PRN adjunctive meds)

VITALS: q4h with clonidine dosing

Gatorade: q4h

#### ADJUNCTIVE MEDICATIONS ON DISCHARGE:

- Clonidine and clonazepam (tapering doses), see example taper plans below (tapers may need to be adjusted if concurrent alcohol or sedative dependence)
- PRN prochlorperazine 10mg q24h x7 days
- PRN trazodone 50-100mg OR zolpidem 5-10mg in the evening once daily x7 days
- Nicotine replacement therapy if tobacco use and interested in on dc

#### EXAMPLE TAPER PLANS for clonidine and clonazepam on discharge:

**[Clonidine Example)**

- *clonidine 0.1 mg 4 times a day, to be tapered by 0.1 mg every 2 days*
- Days 1 and 2: clonidine 0.1mg 4 times a day
- Days 3 and 4: clonidine 0.1mg 3 times a day
- Days 5 and 6: clonidine 0.1mg 2 times a day
- Day 7: clonidine 0.1mg once and then discontinue

**[Clonazepam Example)**

- *clonazepam 0.5 mg two times a day, to be tapered by 0.25 mg (half a tablet) per day every 2 days*
- Days 1 and 2: clonazepam 1mg (TDD)
- Days 3 and 4: clonazepam 0.75mg
- Days 5 and 6: clonazepam 0.5mg
- Days 7 and 8: clonazepam 0.25mg and then discontinue on Day 8

**Supplemental Resource 2:** Shared Decision-Making Tool for Medications for Opioid Use Disorder

# QUIT OPIOIDS

FOR GOOD

WITH MEDICATION

REASONS YOU MIGHT CHOOSE MEDICATION

**AND**

WHICH MEDICATION IS BETTER FOR YOU?

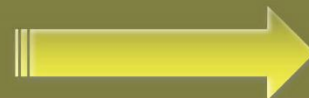

## Few words about opioid addiction

- Opioid addiction is a **chronic medical condition**, once it develops it remains present whether people are using opioids or not
- Patients with opioid addiction have abnormal function of some brain centers which cause them to have strong, and difficult to resist urges to use opioid drugs
- In people with opioid addiction, stopping opioid use is a first step to improve quality of their life, **BUT**, most people are unable to resist using opioids **without the help of a medication**
- Many who go to the hospital to detoxify off opioids and return home **without medication relapse within few weeks, and some die of overdose**
- There are three medications to help with craving and the urge to use to prevent relapse:

methadone

buprenorphine  
(Suboxone)

naltrexone  
(Vivitrol)

Each of these medications have a different mechanism of action

Your chance of having good medication response is best if you take the medication that fits your personal needs, preferences, and treatment goals

- The doctor is here to help you make a choice about your path to the recovery

**Addiction is difficult to cure, but it is a disorder that can be managed, like diabetes or hypertension, with medications and lifestyle changes**

## Good things about taking medications

- People relapse because they cannot stop thinking about the drug. With the right medication, craving and intrusive thoughts go away and decisions to abstain from the drug are easier to make.
- Medication reduces rate of overdose by half for those who stay on medication
- Medication can be used together with therapy or can be used without it, both strategies are effective
- Medication can help with the recovery effort, they are bridge to long term recovery
- You may not need to remain on medication once you are stable in your recovery. Working with your doctor you can re-evaluate if it is safe to come off the medication.

## Bad things about taking medications

- It can take time to get used to the medication
- Medication can cause side-effects
- Medications and doctor's visits can be expensive, though some insurance may help to cover it
- Medications can be a reminder of having a problem with drugs and people may be judgmental about you taking them.

**If you are not sure about being on a medication, you can always try it for 1-2 months to see if it is helpful for you**

## What medications can I take?

### METHADONE

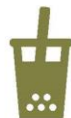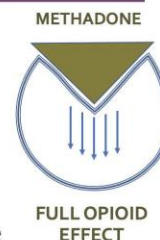

- A “gold standard” in the treatment of opioid addiction, it is considered to be the most effective medication
- Methadone strongly activates opioid receptors in the brain (similarly to heroin), and eliminates withdrawal, reduces craving, and blocks the high from heroin/painkillers
- Patients taking methadone either stop using heroin or other opioids, or use much less, have fewer medical problems, and have better social and work functioning

### METHADONE DOWNSIDES

- Methadone can only be given in a specialized methadone clinic, where you need to go every day at the beginning of treatment to receive the dose and be observed
- Needs to be taken every day and if you miss the dose you may go into withdrawal
- Methadone is a potent medication and can cause sedation and overdose if not taken properly and if mixed with alcohol or sedatives
- Methadone may produce side-effects like nausea, sweating, constipation, sexual problems, and heart problems



## BUPRENORPHINE

(Suboxone, Zubsolv)

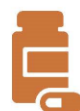

### BUPRENORPHINE

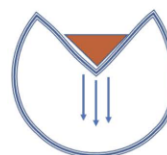

### PARTIAL OPIOID EFFECT

- Works similarly to methadone, eliminates withdrawal and drug craving, but it only partially activates opioid receptors and therefore is safer and has fewer side effects
- Buprenorphine is safer than methadone, and therefore it can be prescribed by a doctor or a nurse and taken at home
- Both methadone and buprenorphine will protect you from the overdose, but only if you keep taking the medication every day
- Both methadone and buprenorphine cannot be stopped abruptly, or you will experience withdrawal symptoms

### BUPRENORPHINE DOWNSIDES

- Need to be in withdrawal before taking the first dose
- Occasional side-effects such as nausea, constipation, headache, and drowsiness
- Overdose can occur if buprenorphine is mixed with large amount of sedating medications or alcohol

## NALTREXONE (Vivitrol)

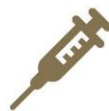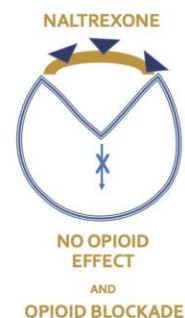

- Naltrexone works differently from methadone or buprenorphine. It completely blocks opioid receptors
- It can be used only after completing detoxification
- Naltrexone can decrease your craving for heroin to prevent relapse
- If you use heroin while on naltrexone, it will block heroin effects and will prevent craving for more drugs
- It has no abuse potential, no overdose risk, and there is no withdrawal when it is stopped
- Is available as a monthly injection give into the buttock

### NALTREXONE DOWNSIDES

- You can only receive the first naltrexone injection after you have been fully withdrawn from the opioids (aka detoxified), which can be difficult because of withdrawal symptoms
- It usually takes a week or more from your last dose of heroin to be ready for naltrexone injection, which can be difficult because you may continue having urges to use while waiting
- When you take naltrexone, opioid painkillers will not control your pain, you would need to use different medication/procedures
- Injection of naltrexone can be painful and irritate injection site and it can cause liver problems
- It may take few weeks for people to feel completely well after receiving first injection of naltrexone

## MYTHS about medications for opioid addiction

**There are no good medication treatments and in order to get better you have to have the willpower to want to stop, go to a residential rehabilitation program, and go to meetings afterwards**

- TRUTHS
- Medications are very effective, for many they are more effective and less expensive than going to a residential program
  - The risk of relapse to opioids is high among people discharged from a residential program without medication; the risk of overdose is also increased
  - The risk of relapse and overdose can be reduced by starting medication before leaving the residential program

**Medication like buprenorphine replaces one drug with another and keeps you from reaching true recovery**

- TRUTHS
- Buprenorphine and a steady dose of methadone does not produce high, which is what perpetuates craving and makes the heroin addictive, on buprenorphine or methadone you feel "normal" all the time
  - Buprenorphine replaces some of the effects of heroin which is why it takes away craving and withdrawal
  - It is much easier to work towards the recovery if you are on the medication and you do not have to cope with incessant craving

**You only need the buprenorphine for a short time, if you take it for too long you will get addicted**

- TRUTHS
- The longer you stay on buprenorphine the more it can help to improve the quality of your life and protect you against the relapse and overdose
  - Over time, most people are taking lower doses and have no side-effects

**When you feel well for few months it means it is time to stop the medication**

- TRUTHS
- This is a common misconception - feeling well means that the medication is a good choice for you and you should continue taking it
  - Stopping the medication too soon puts you are a very high risk of relapse
  - The most important things to consider in considering stopping medication is how much your life has changed since you stopped using illicit opioids.

# TREATMENT PLAN

You and your doctor have discussed ALL medication options

methadone

buprenorphine  
(Suboxone)

naltrexone  
(Vivitrol)

and made a decision today about the BEST medication to help you overcome your addiction to opioids

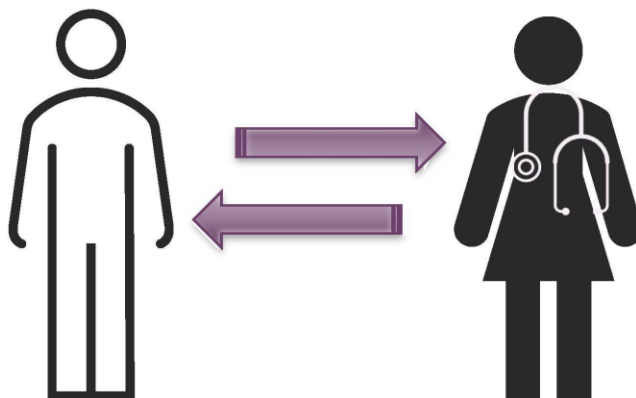

MEDICATION NAME

---
