# Supplementary material for: Rapid Initiation of Injection Naltrexone for Opioid Use Disorder: A Stepped-Wedge Cluster Randomized Clinical Trial
Source: PubMed Central journal article supplement (PMC11079685; doi:10.1001/jamanetworkopen.2024.9744), 2024-05-08
Supplement: jamanetwopen-e249744-s004.pdf [file jamanetwopen-e249744-s004.pdf]

## Data Sharing Statement

Shulman. Rapid Initiation of Injection Naltrexone for Opioid Use Disorder. *JAMA Netw Open*. Published May 08, 2024. doi:10.1001/jamanetworkopen.2024.9744

### Data

**Data available:** Yes

**Data types:** Deidentified participant data

**How to access data:** This data will be available through the NIDA data share website along with the publicly available dataset on <https://datashare.nida.nih.gov/divisions/ctn>

**When available:** beginning date: 07-01-2024

### Supporting Documents

**Document types:** Statistical/analytic code, Informed consent form

**How to access documents:** These will be made available by request via email.

**When available:** With publication

### Additional Information

**Who can access the data:** Anyone requesting the data, researchers whose proposed use of the data has been approved

**Types of analyses:** This will be made available for any research purpose.

**Mechanisms of data availability:** This is will be made available with investigator support with a signed data access agreement.
